# Supplementary material
Source: HighWire-hosted journal article supplement (http://www.jneurosci.org/highwire/filestream/602191/field_highwire_adjunct_files/0/Supplemental_Material.pdf)

## SUPPLEMENTAL INFORMATION

### SUPPLEMENTAL DATA

**Table 1: Nuclear proteins with the same NLS sequence as nuc-ErbB3**

| Protein | Topology | Function                                               |
|---------|----------|--------------------------------------------------------|
| SFR2    | Nucleus  | Splicing factor, RNA binding                           |
| SFR5    | Nucleus  | Splicing factor, RNA binding                           |
| SFR6    | Nucleus  | Splicing factor, RNA binding                           |
| SFR7    | Nucleus  | Splicing factor, RNA binding, Zinc Finger              |
| SFR8    | Nucleus  | Splicing factor, RNA binding, Transcription regulation |
| SFRB    | Nucleus  | Splicing factor, RNA binding                           |
| U2AG    | Nucleus  | Splicing factor, RNA binding, Zinc Finger              |
| U2R2    | Nucleus  | Small ribonucleoprotein, RNA binding                   |
| RU17    | Nucleus  | Small ribonucleoprotein, RNA binding                   |
| SON     | Nucleus  | RNA binding, repressor                                 |
| SRA4    | Nucleus  | Links transcription and pre-mRNA processing            |
| TR2A    | Nucleus  | RNA binding, mRNA processing                           |
| Z265    | Nucleus  | Zinc finger transcription factor                       |
| GGC1    | Nucleus  | Unknown                                                |

**Table 2: Schwann cell genes with promoters that interact with nuc-ErbB3**

| Accession number | Gene Name                                                        | Cluster        |
|------------------|------------------------------------------------------------------|----------------|
| NM_012983        | myosin ID (Myo1d)                                                | IO,A           |
| BC088108         | protein kinase inhibitor, gamma                                  | IO,N,IMO       |
| NM_021579        | nuclear RNA export factor 1 (Nxf1)                               | IO,N,IMO       |
| XM_340861        | dual specificity phosphatase 14                                  |                |
| XM_213679        | CGG triplet repeat binding protein 1                             |                |
| NM_031579        | protein tyrosine phosphatase 4a1 (Ptp4a1)                        | IO,N,IMO       |
| NM_017353        | solute carrier family 7, member 5 (Slc7a5)                       | PH             |
| NM_022962        | latrophilin 1 (Lphn1)                                            | PH             |
| XM_214340        | NIMA (never in mitosis gene a)-related expressed kinase 1 (Nek1) | IO,N,IMO       |
| BC107657         | adducin 1 (alpha)                                                | IO,A,PH        |
| NM_001017486     | glioblastoma amplified sequence (Gbas)                           |                |
| NM_173838        | frizzled homolog 5 (Fzd5)                                        | DEV,DIF        |
| BC061858         | polypyrimidine tract binding protein 1                           | IO,N,TR,PH,IMO |
| NM_001011925     | nucleoporin 93kDa (Nup93)                                        | IO,N,IMO       |
| NM_001024248     | alpha2u globulin                                                 |                |
| XM_001071407     | similar to Nuclear transport factor 2 (NTF-2)                    |                |
| NM_001007711     | general transcription factor IIF, polypeptide 1 (Gtf2f1)         | IO,IMO         |

|              |                                                                       |                             |
|--------------|-----------------------------------------------------------------------|-----------------------------|
| XM_243390    | fizzy/cell division cycle 20 related 1 (Drosophila)                   |                             |
| XM_001057132 | SKI-like, transcript variant 2 (Skil)                                 |                             |
| XM_346305    | similar to ribosomal protein S27a (predicted)                         | IO                          |
| NM_031770    | guanine nucleotide binding protein (G protein), beta 5 (Gnb5)         |                             |
| Y10370       | GABA-BR1b receptor                                                    | DEV,DIF,PH                  |
| XM_341241    | Max dimerization protein 4 (Mxd4)                                     | IMO                         |
| NM_054004    | cullin-associated and neddylation-dissociated 1 (Cand1)               | IO,DEV,DIF,N,P<br>RE,TR,IMO |
| NM_031143    | diacylglycerol kinase zeta (Dgkz)                                     | IO,N,PH,IMO                 |
| XM_213574    | polymerase (RNA) II (DNA directed) polypeptide H (Polr2h)             | IO,N,IMO                    |
| XM_578547    | mitogen-activated protein kinase kinase kinase 5 isoform 2            |                             |
| BC060518     | valosin-containing protein                                            | IO,DEV,DIF,N,P<br>H,IMO     |
| XM_236210    | poliovirus receptor-related 1 (Pvr11)                                 |                             |
| NM_001009268 | ARP2 actin-related protein 2 homolog (yeast) (Actr2)                  | IO,A                        |
| BC060597     | tubulin, beta 2c                                                      | IO,PH                       |
| XM_343119    | jagged 2 (Jag2)                                                       | DEV,DIF                     |
| NM_031037    | guanine nucleotide binding protein                                    |                             |
| XM_341998    | zinc and double PHD fingers family 2 (Dpf2_predicted)                 | DEV,DIF                     |
| NM_019357    | ezrin (Ezr)                                                           | IO,DEV,DIF,A,P<br>H         |
| XM_001067052 | tousled-like kinase 2 (Arabidopsis)(Tlk2_predicted)                   |                             |
| XM_341145    | TIP41, TOR signalling pathway regulator-like (S. cerevisiae)          |                             |
| XM_215466    | general transcription factor II H, polypeptide 2 (predicted) (Gtf2h2) | IO,N,PRE,TR,PH,<br>IMO      |
| XM_214476    | similar to E2f3 protein                                               |                             |
| NM_212495    | bromodomain containing 2 (Brd2)                                       | IO,DEV,DIF,N,P<br>H,IMO     |
| NM_013079    | asparagine synthetase (Asns)                                          |                             |
| BC105826     | protein-tyrosine sulfotransferase 1                                   | IO,IMO                      |
| BC062225     | protein-tyrosine sulfotransferase 1                                   | IO,N,TR,IMO                 |
| NM_139113    | nuclear receptor subfamily 2, group F, member 6 (Nr2f6)               | IO,DEV,DIF,N,I<br>MO        |
| NM_080778    | nuclear receptor subfamily 2, group F, member 2 (Nr2f2)               | IO,DEV,DIF,N,T<br>R,PH,IMO  |
| BC099822     | v-raf murine sarcoma 3611 viral oncogene homolog                      | IO,PH,IMO                   |
| XM_225512    | WD repeat domain 37 (Wdr37)                                           |                             |
| NM_017348    | solute carrier family 6 member 8 (Slc6a8)                             |                             |
| XM_001075055 | High mobility group protein 1 (HMG-1)                                 |                             |
| NM_053996    | solute carrier family 6 member 7 (Slc6a7)                             | PH                          |
| XM_001054666 | Mediator of RNA polymerase II transcription subunit 12                |                             |
| XM_213569    | eukaryotic translation initiation factor 4 gamma, 1 (Eif4g1)          |                             |
| NM_001024793 | cell division cycle 27 homolog (cdc27)                                | IO,N,IMO                    |
| XM_215371    | ubiquitin-conjugating enzyme E2G 2                                    | IO,IMO                      |
| NM_001007005 | Rho GDP dissociation inhibitor (GDI) alpha (Arhgdia)                  | IO,DEV,DIF                  |

|               |                                                      |                            |
|---------------|------------------------------------------------------|----------------------------|
| XM_236687     | oxidative-stress responsive 1                        | IO,DEV,DIF,N,T<br>R,PH,IMO |
| NM_134353     | poly(A) binding protein, cytoplasmic 1 (Pabpc1)      | IO,N,PH,IMO                |
| NM_175843     | sequestosome 1 (Sqstm1)                              |                            |
| NM_001008281. | proteasome 26S subunit, non-ATPase, 3 (Psm3)         |                            |
| BC098831      | FUS interacting protein (serine-arginine rich) 1     | IO,N,IMO                   |
| XM_213421     | vascular endothelial zinc finger 1 (Vezf1_predicted) | IO,DEV,DIF,N,T<br>R,IMO    |
| XM_574173     | solute carrier family 25, member 5                   | IO,IMO                     |
| XM_343776     | plastin 3 (T-isoform) (Pls3)                         | IO,A,PH                    |

IO: Intracellular organelle, N: Nucleus, DIF: Cell differentiation  
DEV: Cellular development, PH: Phosphoprotein, A: Actin cytoskeleton  
PRE: Transcriptional preinitiation complex assembly,  
TR: Regulation of transcription from RNA polymerase II promoter,  
IMO: Intracellular membrane bound organelle

**Supplementary Figure 1:** Cos-7 cells were transfected with STREP-ErbB4-FL construct, which expresses the full-length ErbB4 receptor. After addition of 10nM beta1-Heregulin for 30min, ErbB4 was localized in the nucleus of Cos-7 cells as detected with an ErbB4 specific antibody (Figure S1a). Addition of gamma-secretase inhibitor or MMP inhibitor during the treatment with heregulin completely blocked the cleavage and subsequent nuclear localization of ErbB4 (Figures S1b & 1c respectively) showing that the protease inhibitors were functionally active.

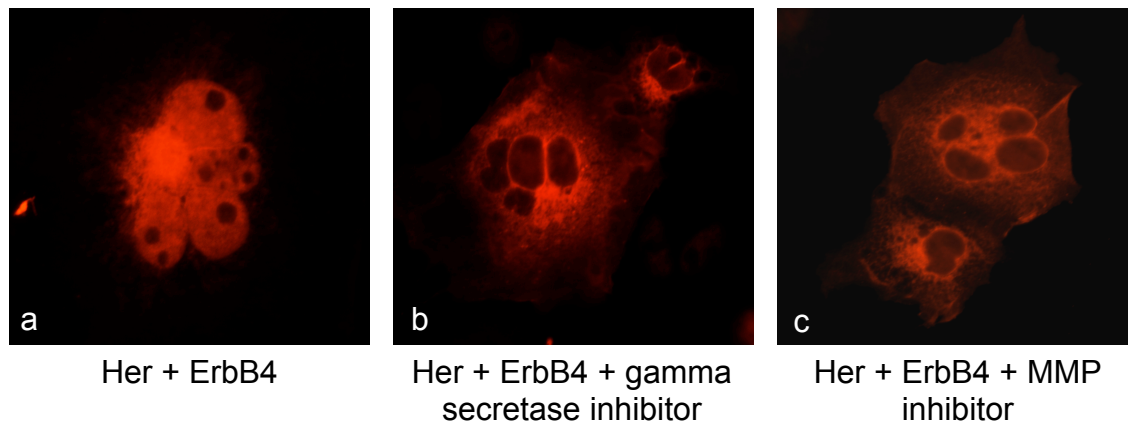

**Supplementary figure 2:** Cos-7 cells were transfected with the human cDNA clone FLJ43038 (NBRC, Japan), which expresses the human ErbB3 variant AK125028. 72 hours post-transfection the cells were stained with a c-terminal specific ErbB3 antibody (Santa Cruz) that showed nuclear localization of AK125028 (Figure S2A). Protein lysates from AK125028 transfected Cos-7 cells were blotted with the ErbB3 antibody and compared to Schwann cell nuclear extracts blotted with the same ErbB3 antibody. This showed that the nuclear variant AK125028 runs at 50kD as the endogenous nuc-ErbB3 of rat primary Schwann cells (Figure S2B).

**A**

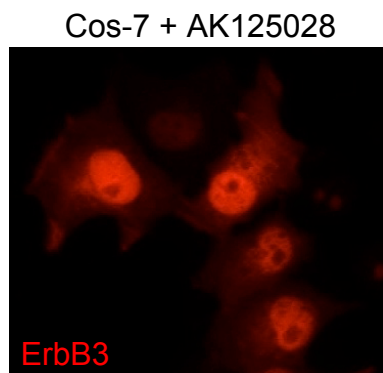

**B**

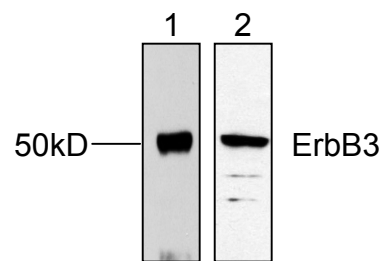

1: Cos-7 lysates  
2: Schwann cell nuclear extracts

**Supplementary Figure 3:** To examine the role of nuc-ErbB3 during the interaction of Schwann cells with axons we designed two siRNAs that selectively block the expression of the full-length ErbB3 RTK (full length ErbB3 siRNA) without affecting the expression of nuc-ErbB3 or block the expression of both the full-length ErbB3 RTK and the nuc-ErbB3 (nuc-ErbB3 siRNA). We transfected these siRNAs into rat primary Schwann cells using nucleofection and examined the knockdown efficiency by Western blotting. The siRNA targeting the extracellular domain sequence of ErbB3 RTK, downregulated the expression of the full-length receptor by an average of ~50% in comparison to the expression in control (Figure S3A). Similarly, the nuc-ErbB3 siRNA, which is complementary to a sequence in the cytoplasmic domain of ErbB3 showed an average of ~50% downregulation in the expression of full-length ErbB3 as compared to the control (Figure S3A). On the contrary, full length ErbB3 siRNA showed no effect on nuc-ErbB3 expression (Figure S3A nuclear extracts) while nuc-ErbB3 siRNA downregulated the expression of nuc-ErbB3 to an average 80-90% as compared to control expression (Figure S3A nuclear extracts). These experiments show that we can use the combination of these two siRNAs to discriminate between the function of nuc-ErbB3 and the full length ErbB3 since only the nuc-ErbB3 siRNA downregulates the expression of nuc-ErbB3 (by an average of 80-90%) while both siRNAs produce the same effect on the full-length ErbB3 receptor (50% inhibition of expression). In order to reveal the putative function of nuc-ErbB3 on myelination we prepared co-cultures of purified DRG neurons and

siRNA transfected Schwann cells. Treatment of the siRNA transfected Schwann cell-neuron co-cultures with ascorbic acid to initiate myelination resulted in a significant reduction of the amount of myelinated segments in the nuc-ErbB3 siRNA transfected cultures as compared to full-length ErbB3-siRNA or control cultures (Figures S3 B & C).

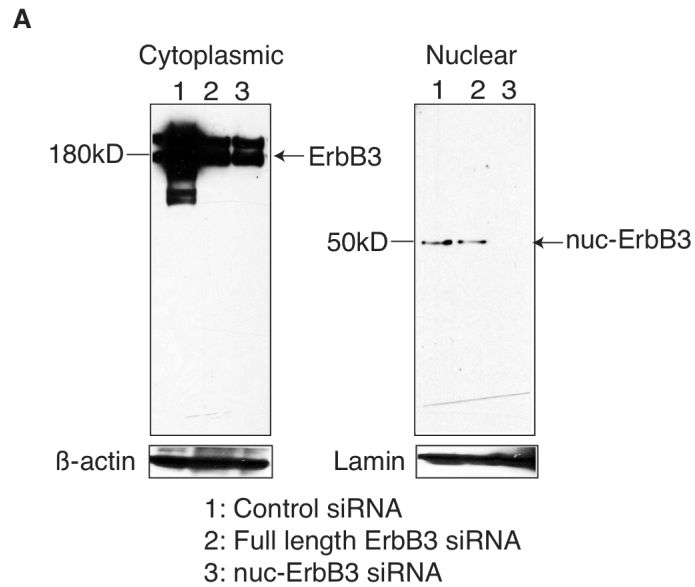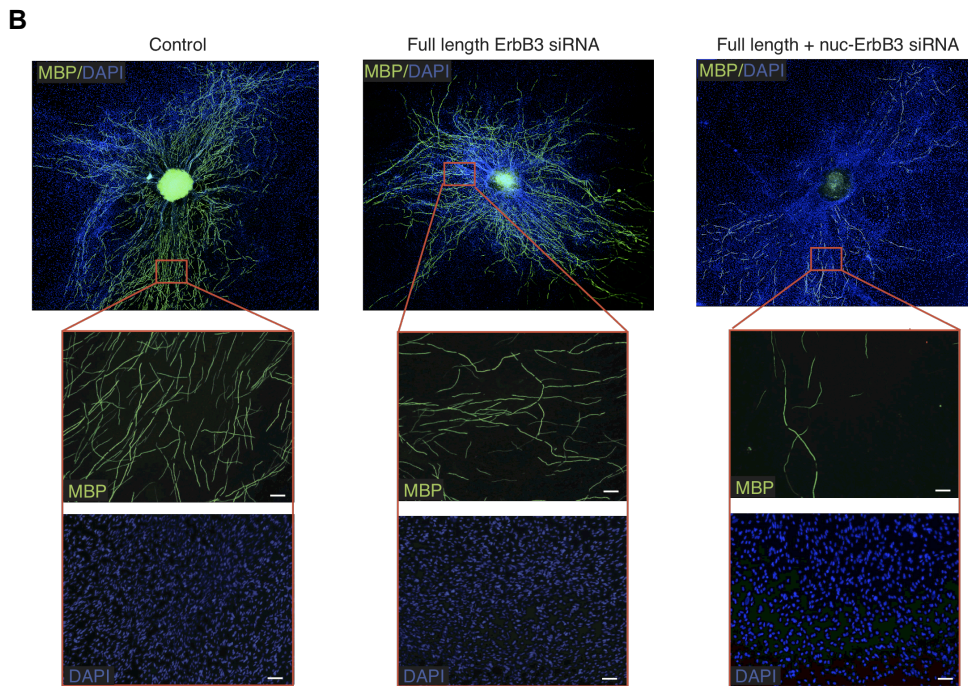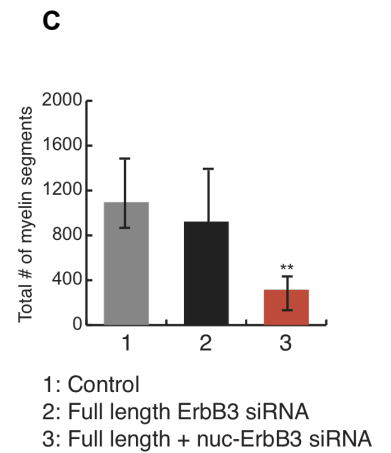

Supplement: Supplemental_Material.pdf [file Supplemental_Material.pdf]
